# Supplementary material
Source: publisher figshare collection journal article supplement (https://frontiersin.figshare.com/ndownloader/files/35137948)
Supplement: Supplementary file [file 35137948]

# **Investigating the Association between seven sleep traits and nonalcoholic fatty liver disease: observational and Mendelian randomization study**

Hong Fan<sup>1,2</sup>, Zhenqiu Liu<sup>1,2,3</sup>, Xin Zhang<sup>1,2</sup>, Huangbo Yuan<sup>2</sup>, Xiaolan Zhao<sup>4</sup>, Renjia Zhao<sup>1,2</sup>, Tingting Shi<sup>1,2</sup>, Sheng Wu<sup>1,2</sup>, Yiyun Xu<sup>1,2</sup>, Chen Suo<sup>1,2</sup>, Xingdong Chen<sup>2,3,4†</sup>, Tiejun Zhang<sup>1, 2†</sup>

1. Department of Epidemiology, School of Public Health, Fudan University, Shanghai, China. Key Laboratory of Public Health Safety (Fudan University), Ministry of Education, China
2. Fudan University Taizhou Institute of Health Sciences, Taizhou, China.
3. State Key Laboratory of Genetic Engineering and Collaborative Innovation Center for Genetics and Development, School of Life Sciences, Fudan University, Shanghai 200438, China.
4. Department of chronic diseases prevention, Taizhou center for disease control and prevention. Taizhou, Jiangsu, China.
5. Human Phenome Institute, Fudan University, 825 Zhangheng Road, Shanghai, China.

†: Correspondence to Tiejun Zhang MD., PhD., Professor of Epidemiology, School of Public Health, Fudan University, Shanghai, 200032, China. Email: tjzhang@shmu.edu.cn; TEL/FAX: +86-21-54237088; or Xingdong Chen MD., PhD.,

School of Life Sciences, Fudan University, Shanghai, 200032, China. Email:  
xingdongchen@fudan.edu.cn; TEL/FAX: +86-21-51630602.

**TABLE OF CONTENTS**

SUPPLEMENTARY METHODS.....3

Inclusion and exclusion criteria for participants.....3

Genotyping and imputation .....3

  

SUPPLEMENTARY FIGURES

Figure S1.....4

Figure S2.....5

Figure S3.....6

Figure S4.....6

  

SUPPLEMENTARY TABLES

Table S1.....7

Table S2.....7

Table S3.....9

Table S4.....10

  

REFERENCES.....11

## **SUPPLEMENTARY METHODS**

### **inclusion and exclusion criteria for participants**

In the observational association analysis, we excluded those individuals with a sleep duration less than 3 hours and more than 15 hours that might be outliers, and stratified the remaining sleep duration into short ( $< 7$  hours), intermediate (7–8 hours), and long ( $> 8$  hours) groups as 7-8h is the recommended sleep duration [1; 2]. At the same time, the answers which were “Do not know” or “Prefer not to answer” on these seven sleep-related questions were also excluded in the following analysis. In the MR analysis, short sleep was defined as sleep time less than 6 hours and long sleep was defined as sleep time more than 9 hours followed the published genome wide association studies (GWAS)[3].

### **Genotyping and imputation**

Genotyping, primary genotype quality control and imputation were performed by the UK Biobank, which genotyped the samples using BiLEVE array or the UK Biobank array[4]. The genotype data were imputed using the HRC reference panel[5] or a merged reference panel consisting of UK10K[6] and 1000 Genomes phase 3[7]

## SUPPLEMENTARY TABLE FIGURE

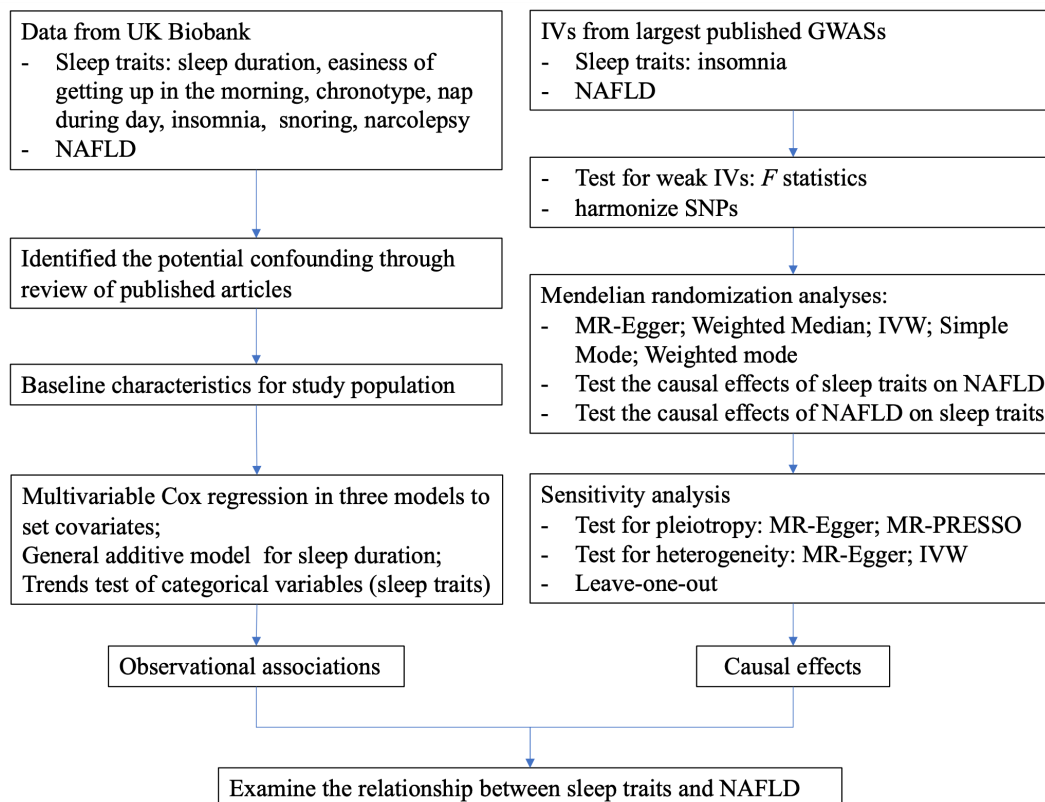

Figure S1. Study design flowchart.

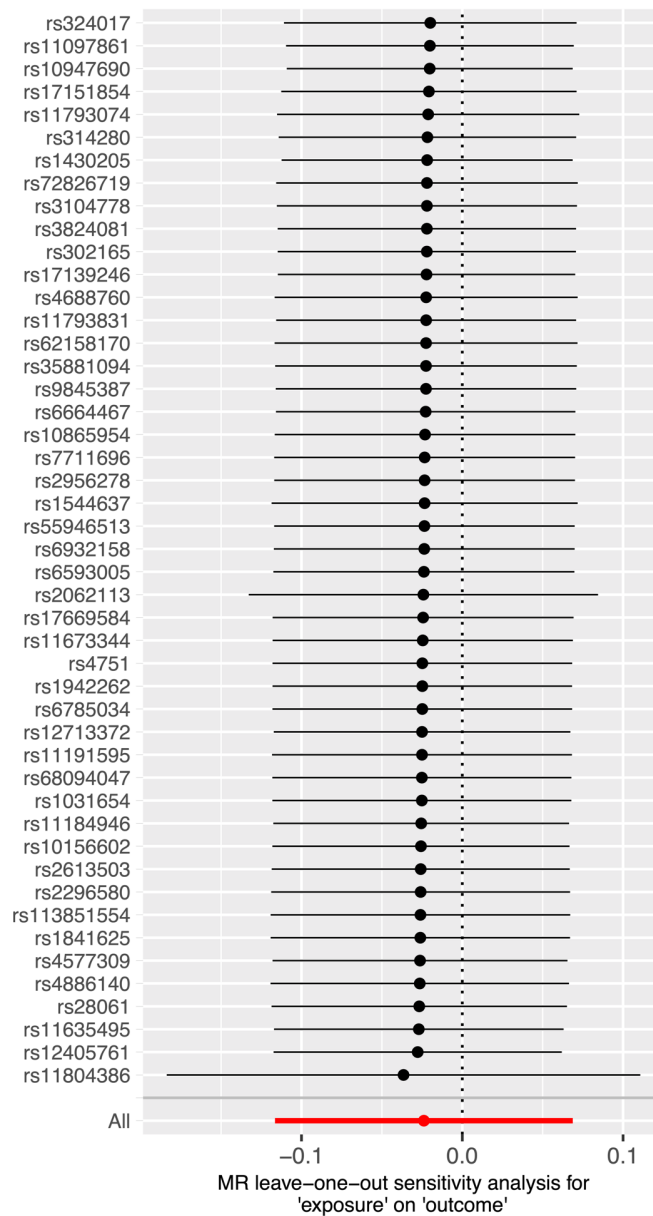

Figure S2. Leave-one-out analysis related to the insomnia genetic instrument with nonalcoholic fatty liver disease.

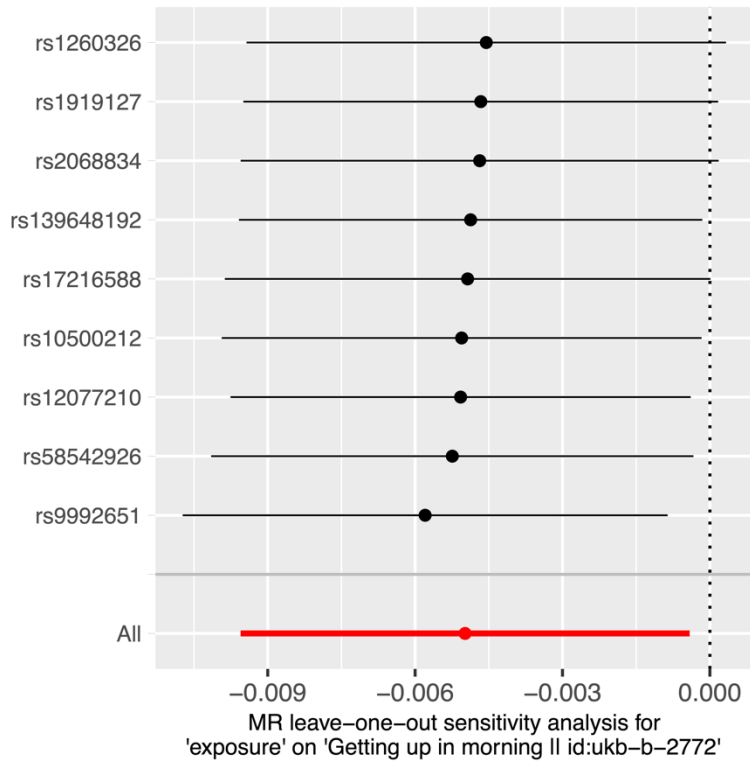

Figure S3. Leave-one-out analysis related to the nonalcoholic fatty liver disease instrument with easiness of getting up in the morning.

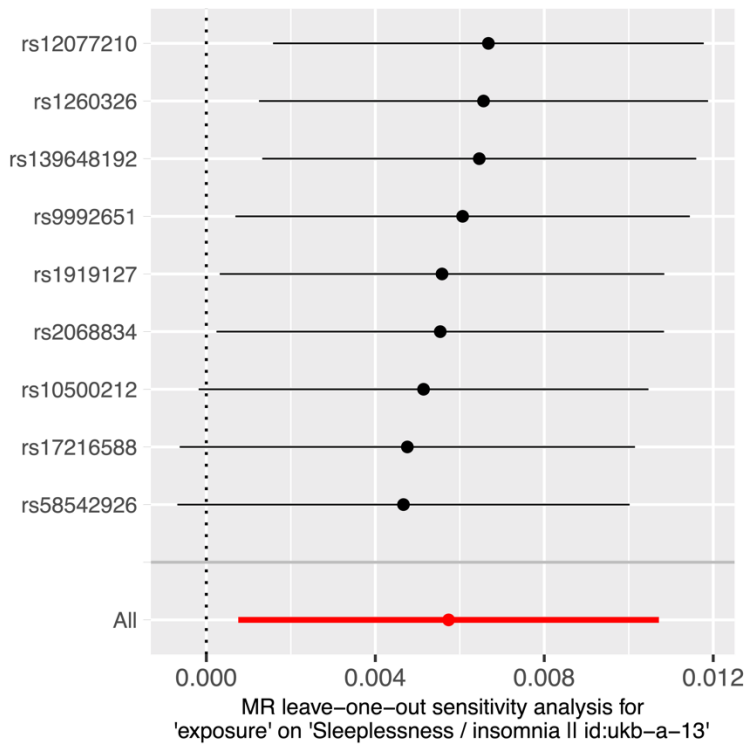

Figure S4. Leave-one-out analysis related to the nonalcoholic fatty liver disease instrument with insomnia.

## SUPPLEMENTARY TABLE

Table S1. Characteristics of the GWAS data for instrumental variables.

| Sleep traits | nSNP | Ethnic background | Author    | year |
|--------------|------|-------------------|-----------|------|
| Insomnia[8]  | 57   | European          | Lane JM   | 2019 |
| NAFLD[9]     | 12   | European          | Anstee QM | 2020 |

Table S2. Genetic instrumental variables implemented in the study and their association with each insomnia.

| Trait    | SNP         | Chr:BP      | Eff/Alt | EA    | INFO | OR [95% CI]      | P Value    | Nearest Gene           |
|----------|-------------|-------------|---------|-------|------|------------------|------------|------------------------|
| Insomnia | rs11184946  | 1:107185225 | T/C     | 0.417 | 1    | 1.03 [1.02-1.05] | 2.90x10-10 | LOC126987/PRMT6        |
| Insomnia | rs6664467   | 1:151738403 | G/A     | 0.863 | 0.99 | 1.05 [1.03-1.06] | 4.50x10-8  | OAZ3                   |
| Insomnia | rs4751      | 1:1686040   | T/G     | 0.425 | 1    | 1.03 [1.02-1.05] | 1.60x10-8  | NADK                   |
| Insomnia | rs2644128   | 1:201793440 | G/C     | 0.55  | 1    | 1.04 [1.03-1.06] | 1.00x10-12 | NAV1                   |
| Insomnia | rs12405761  | 1:57850914  | A/C     | 0.571 | 1    | 1.04 [1.03-1.05] | 2.60x10-11 | DAB1                   |
| Insomnia | rs2613503   | 1:72839774  | A/C     | 0.802 | 0.99 | 1.04 [1.02-1.06] | 2.80x10-7  | LOC100132353/KRT8P21   |
| Insomnia | rs11804386  | 1:87738947  | A/G     | 0.332 | 1    | 1.04 [1.03-1.06] | 2.60x10-8  | LOC339524/LMO4         |
| Insomnia | rs62158170  | 2:114082175 | A/G     | 0.784 | 0.99 | 1.05 [1.04-1.08] | 5.70x10-13 | PAX8/LOC100130100      |
| Insomnia | rs4577309   | 2:191288833 | A/G     | 0.468 | 0.99 | 1.03 [1.02-1.05] | 3.70x10-9  | FLJ20160               |
| Insomnia | rs12713372  | 2:58377014  | C/T     | 0.566 | 0.99 | 1.02 [1.01-1.04] | 1.20x10-5  | VRK2                   |
| Insomnia | rs35881094  | 2:58922921  | G/T     | 0.426 | 0.99 | 1.05 [1.03-1.06] | 3.00x10-15 | LOC644456/LOC730134    |
| Insomnia | rs2192338   | 2:59833168  | C/G     | 0.78  | 0.99 | 1.05 [1.03-1.06] | 1.20x10-7  | LOC647038/BCL11A       |
| Insomnia | rs113851554 | 2:66750564  | T/G     | 0.058 | 0.93 | 1.20 [1.16-1.24] | 1.30x10-41 | MEIS1                  |
| Insomnia | rs72826719  | 2:66976854  | A/G     | 0.049 | 0.97 | 1.10 [1.07-1.14] | 2.20x10-12 | LINC01797/LINC01799    |
| Insomnia | rs9845387   | 3:116425935 | C/A     | 0.959 | 0.99 | 1.10 [1.06-1.14] | 2.10x10-8  | BZW1L1/LOC285194       |
| Insomnia | rs6785034   | 3:184781830 | A/G     | 0.422 | 1    | 1.03 [1.02-1.04] | 9.60x10-5  | VPS8/C3orf70           |
| Insomnia | rs4683301   | 3:46931478  | T/A     | 0.6   | 0.99 | 1.04 [1.02-1.05] | 4.60x10-8  | PTHR1                  |
| Insomnia | rs10865954  | 3:49211989  | T/C     | 0.334 | 1    | 1.04 [1.02-1.05] | 1.70x10-9  | KLHDC8B                |
| Insomnia | rs4688760   | 3:49980596  | T/C     | 0.69  | 0.99 | 1.05 [1.03-1.06] | 1.00x10-12 | RBM6                   |
| Insomnia | rs55946513  | 3:52599792  | C/T     | 0.934 | 1    | 1.05 [1.02-1.08] | 7.30x10-6  | PBRM1                  |
| Insomnia | rs11097861  | 4:105330133 | G/A     | 0.715 | 0.99 | 1.04 [1.03-1.05] | 1.70x10-9  | TACR3/CXXC4            |
| Insomnia | rs1841625   | 4:91287477  | G/A     | 0.432 | 0.99 | 1.03 [1.01-1.04] | 3.60x10-8  | MGC48628               |
| Insomnia | rs28061     | 5:102543878 | A/G     | 0.692 | 0.99 | 1.04 [1.02-1.05] | 2.10x10-8  | HISPPD1/C5orf30        |
| Insomnia | rs1592757   | 5:103889998 | C/G     | 0.357 | 1    | 1.04 [1.03-1.06] | 4.60x10-10 | NUDT12/RAB9P1          |
| Insomnia | rs7711696   | 5:135486536 | T/G     | 0.305 | 1    | 1.05 [1.03-1.06] | 9.90x10-12 | SMAD5                  |
| Insomnia | rs1430205   | 5:87678585  | T/C     | 0.458 | 1    | 1.03 [1.02-1.05] | 3.60x10-8  | LOC100130786/LOC645323 |

|          |            |              |     |       |      |                  |            |                            |
|----------|------------|--------------|-----|-------|------|------------------|------------|----------------------------|
| Insomnia | rs6932158  | 6:101246010  | C/T | 0.491 | 1    | 1.03 [1.02-1.05] | 2.80x10-8  | ASCC3                      |
| Insomnia | rs314280   | 6:105400837  | G/A | 0.548 | 1    | 1.04 [1.02-1.05] | 3.50x10-10 | RP3-439I14.1               |
| Insomnia | rs10947690 | 6:37631768   | G/A | 0.261 | 1    | 1.04 [1.02-1.06] | 3.50x10-8  | MDGA1                      |
| Insomnia | rs3824081  | 7:1024581    | T/C | 0.475 | 0.99 | 1.04 [1.03-1.06] | 1.10x10-8  | CYP2W1                     |
| Insomnia | rs10280045 | 7:114076394  | G/C | 0.574 | 0.99 | 1.04 [1.03-1.05] | 1.00x10-10 | FOXP2                      |
| Insomnia | rs302165   | 7:18323899   | G/A | 0.216 | 0.99 | 1.04 [1.02-1.06] | 2.40x10-6  | PRPS1L1/HDAC9              |
| Insomnia | rs6593005  | 7:52584625   | G/A | 0.741 | 1    | 1.03 [1.02-1.05] | 8.60x10-9  | LOC100131871/LOC100133258  |
| Insomnia | rs17151854 | 8:10236559   | T/G | 0.154 | 0.99 | 1.06 [1.04-1.08] | 2.40x10-8  | MSRA                       |
| Insomnia | rs11793831 | 9:23362311   | G/T | 0.583 | 1    | 1.04 [1.02-1.05] | 1.50x10-6  | FLJ35282/LOC402360         |
| Insomnia | rs11793074 | 9:23820070   | A/G | 0.853 | 1    | 1.04 [1.02-1.06] | 2.30x10-7  | ELAVL2                     |
| Insomnia | rs10156602 | 9:96345328   | A/G | 0.638 | 0.98 | 1.04 [1.03-1.05] | 3.40x10-12 | PHF2                       |
| Insomnia | rs2296580  | 10:104241683 | G/T | 0.702 | 1    | 1.05 [1.04-1.08] | 8.70x10-12 | ACTR1A                     |
| Insomnia | rs11191595 | 10:104943048 | A/C | 0.937 | 0.9  | 1.10 [1.06-1.14] | 1.50x10-9  | NT5C2                      |
| Insomnia | rs10838708 | 11:47441513  | G/A | 0.541 | 0.98 | 1.03 [1.02-1.04] | 2.50x10-9  | PSMC3                      |
| Insomnia | rs68094047 | 12:109855201 | T/C | 0.25  | 0.99 | 1.04 [1.03-1.06] | 3.30x10-9  | MYO1H                      |
| Insomnia | rs324017   | 12:57487814  | A/C | 0.295 | 1    | 1.05 [1.04-1.07] | 1.10x10-10 | NAB2/STAT6                 |
| Insomnia | rs2956278  | 12:84698234  | G/A | 0.215 | 1    | 1.05 [1.03-1.07] | 1.30x10-8  | LOC401725/LOC100128335     |
| Insomnia | rs2147141  | 13:112707954 | G/C | 0.543 | 0.98 | 1.04 [1.02-1.05] | 8.20x10-8  | C13orf16/SOX1              |
| Insomnia | rs1923770  | 13:53786568  | T/A | 0.383 | 1    | 1.05 [1.03-1.06] | 2.30x10-12 | OLFM4/RP11-365K22.1        |
| Insomnia | rs1031654  | 13:54382035  | C/A | 0.202 | 1    | 1.05 [1.03-1.07] | 2.00x10-9  | LOC100133285/RP11-365K22.1 |
| Insomnia | rs4886140  | 13:59833519  | G/A | 0.668 | 0.98 | 1.04 [1.03-1.06] | 3.10x10-10 | LOC100129308/DIAPH3        |
| Insomnia | rs11635495 | 15:67804682  | C/T | 0.515 | 1    | 1.04 [1.02-1.05] | 6.80x10-9  | IQCH/C15orf61              |
| Insomnia | rs4886860  | 15:74340336  | G/C | 0.234 | 1    | 1.05 [1.03-1.06] | 6.10x10-12 | PML                        |
| Insomnia | rs1544637  | 16:51484837  | T/C | 0.488 | 0.99 | 1.03 [1.02-1.04] | 3.00x10-8  | UNGP1/LOC642659            |
| Insomnia | rs3104778  | 16:52633652  | A/G | 0.589 | 0.99 | 1.03 [1.01-1.04] | 4.20x10-8  | LOC643714                  |
| Insomnia | rs2062113  | 16:59476179  | T/C | 0.43  | 1    | 1.04 [1.02-1.05] | 1.90x10-10 | LOC644600/LOC644649        |
| Insomnia | rs17139246 | 16:6106260   | C/T | 0.389 | 0.98 | 1.03 [1.02-1.05] | 4.10x10-8  | RBFOX1                     |
| Insomnia | rs17669584 | 17:28899614  | G/A | 0.195 | 0.96 | 1.04 [1.03-1.06] | 3.60x10-8  | LOC729704                  |
| Insomnia | rs11651809 | 17:43255681  | G/C | 0.296 | 0.98 | 1.05 [1.04-1.07] | 2.10x10-15 | HEXIM2/LOC339192           |
| Insomnia | rs1942262  | 18:52873317  | A/G | 0.292 | 0.99 | 1.04 [1.03-1.06] | 1.10x10-13 | CCDC68/TCF4                |
| Insomnia | rs11673344 | 19:37684966  | G/A | 0.38  | 1    | 1.04 [1.03-1.06] | 9.00x10-10 | ZNF585B                    |



Table S3. Genetic instrumental variables implemented in the study and their association with each nonalcoholic fatty liver disease.

| Trait | SNP         | chr | Effect<br>allele | Other<br>allele | gene     | pval     | OR    | CI             |
|-------|-------------|-----|------------------|-----------------|----------|----------|-------|----------------|
| NAFLD | rs12077210  | 1   | T                | C               | LEPR     | 5.62E-08 | 1.484 | (1.287, 1.711) |
| NAFLD | rs1260326   | 2   | T                | C               | GCKR     | 1.06E-10 | 1.278 | (1.186, 1.377) |
| NAFLD | rs1919127   | 2   | C                | T               | C2orf16  | 5.61E-10 | 1.29  | (1.190, 1.398) |
| NAFLD | rs2068834   | 2   | C                | T               | ZNF512   | 8.49E-11 | 1.302 | (1.202, 1.410) |
| NAFLD | rs9992651   | 4   | A                | G               | HSD17B13 | 2.78E-08 | 0.744 | (0.671, 0.826) |
| NAFLD | rs13118664  | 4   | T                | A               | HSD17B13 | 1.41E-08 | 0.74  | (0.667, 0.821) |
| NAFLD | rs139648192 | 8   | T                | C               | -        | 5.20E-08 | 1.538 | (1.317, 1.796) |
| NAFLD | rs58542926  | 19  | T                | C               | TM6SF2   | 2.05E-11 | 1.609 | (1.400, 1.849) |
| NAFLD | rs8107974   | 19  | T                | A               | SUGP1    | 2.58E-12 | 1.632 | (1.423, 1.872) |
| NAFLD | rs17216588  | 19  | T                | C               | -        | 7.25E-14 | 1.612 | (1.423, 1.827) |
| NAFLD | rs10500212  | 19  | T                | C               | PBX4     | 3.40E-12 | 1.549 | (1.369, 1.752) |
| NAFLD | rs738409    | 22  | G                | C               | PNPLA3   | 1.45E-49 | 1.827 | (1.687, 1.979) |

Table S4. Heterogeneity test and pleiotropy test for instruments

| Sleep trait                       | F statistic | MR-PRESSO |          | Cochran's Q test<br>(MR Egger) |         | Cochran's Q test<br>(IVW) |         | Horizontal pleiotropy tests |       |         |
|-----------------------------------|-------------|-----------|----------|--------------------------------|---------|---------------------------|---------|-----------------------------|-------|---------|
|                                   |             | RSSobs    | P presso | Q                              | P value | Q                         | P Value | Intercept                   | se    | P value |
| Sleep traits on NAFLD             |             |           |          |                                |         |                           |         |                             |       |         |
| Insomnia                          | 31.802      | 64.110    | 0.282    | 51.517                         | 0.234   | 52.032                    | 0.251   | 0.011                       | 0.016 | 0.506   |
| NAFLD on sleep traits             |             |           |          |                                |         |                           |         |                             |       |         |
| Easiness of getting up in morning | 55.156      | 5.956     | 0.939    | 1.056                          | 0.994   | 1.231                     | 0.996   | -0.001                      | 0.003 | 0.688   |
| Insomnia                          |             | 19.607    | 0.189    | 6.090                          | 0.529   | 6.772                     | 0.561   | -0.003                      | 0.003 | 0.436   |

## References

- [1] M. Hirshkowitz, K. Whiton, S.M. Albert, C. Alessi, O. Bruni, L. DonCarlos, N. Hazen, J. Herman, P.J. Adams Hillard, E.S. Katz, L. Kheirandish-Gozal, D.N. Neubauer, A.E. O'Donnell, M. Ohayon, J. Peever, R. Rawding, R.C. Sachdeva, B. Setters, M.V. Vitiello, and J.C. Ware, National Sleep Foundation's updated sleep duration recommendations: final report. *Sleep health* 1 (2015) 233-243.
- [2] X. Li, Q. Xue, M. Wang, T. Zhou, H. Ma, Y. Heianza, and L. Qi, Adherence to a Healthy Sleep Pattern and Incident Heart Failure: A Prospective Study of 408802 UK Biobank Participants. *Circulation* (2020).
- [3] H.S. Dashti, and S.E. Jones, Genome-wide association study identifies genetic loci for self-reported habitual sleep duration supported by accelerometer-derived estimates. *Nature communications* 10 (2019) 1100.
- [4] C. Bycroft, C. Freeman, D. Petkova, G. Band, L.T. Elliott, K. Sharp, A. Motyer, D. Vukcevic, O. Delaneau, J. O'Connell, A. Cortes, S. Welsh, A. Young, M. Effingham, G. McVean, S. Leslie, N. Allen, P. Donnelly, and J. Marchini, The UK Biobank resource with deep phenotyping and genomic data. *Nature* 562 (2018) 203-209.
- [5] S. McCarthy, and S. Das, A reference panel of 64,976 haplotypes for genotype imputation. *Nature genetics* 48 (2016) 1279-83.
- [6] K. Walter, J.L. Min, J. Huang, L. Crooks, Y. Memari, S. McCarthy, J.R. Perry, C. Xu, M. Futema, D. Lawson, V. Iotchkova, S. Schiffels, A.E. Hendricks, P. Danecek, R. Li, J. Floyd, L.V. Wain, I. Barroso, S.E. Humphries, M.E. Hurles, E. Zeggini, J.C. Barrett, V. Plagnol, J.B. Richards, C.M. Greenwood, N.J. Timpson, R. Durbin, and N. Soranzo, The UK10K project identifies rare variants in health and disease. *Nature* 526 (2015) 82-90.
- [7] G.R. Abecasis, D. Altshuler, A. Auton, L.D. Brooks, R.M. Durbin, R.A. Gibbs, M.E. Hurles, and G.A. McVean, A map of human genome variation from population-scale sequencing. *Nature* 467 (2010) 1061-73.
- [8] J.M. Lane, and S.E. Jones, Biological and clinical insights from genetics of insomnia symptoms. *Nature genetics* 51 (2019) 387-393.
- [9] Q.M. Anstee, R. Darlay, S. Cockell, M. Meroni, O. Govaere, D. Tiniakos, A.D. Burt, P. Bedossa, J. Palmer, Y.L. Liu, G.P. Aithal, M. Allison, H. Yki-Järvinen, M. Vacca, J.F. Dufour, P. Invernizzi, D. Prati, M. Ekstedt, S. Kechagias, S. Francque, S. Petta, E. Bugianesi, K. Clement, V. Ratziu, J.M. Schattenberg, L. Valenti, C.P. Day, H.J. Cordell, and A.K. Daly, Genome-wide association study of non-alcoholic fatty liver and steatohepatitis in a histologically characterised cohort(☆). *J Hepatol* 73 (2020) 505-515.
